# Supplementary material for: Effects of Ambient Air Pollution Exposure on Olfaction: A Review
Source: PubMed Central journal article supplement (PMC5089874; doi:10.1289/ehp136), 2016-06-10
Supplement: EHP136.s001.acco.pdf [file EHP136.s001.acco.pdf]

**Note to readers with disabilities:** *EHP* strives to ensure that all journal content is accessible to all readers. However, some figures and Supplemental Material published in *EHP* articles may not conform to [508 standards](#) due to the complexity of the information being presented. If you need assistance accessing journal content, please contact [ehp508@niehs.nih.gov](mailto:ehp508@niehs.nih.gov). Our staff will work with you to assess and meet your accessibility needs within 3 working days.

## **Supplemental Material**

### **Effects of Ambient Air Pollution Exposure on Olfaction: A Review**

Gaurav S. Ajmani, Helen H. Suh, and Jayant M. Pinto

#### **Table of Contents**

**Table S1.** Olfactory function tests

References

**Table S1.** Olfactory function tests

| Test                                                                                                       | Assessed Modality   | Test Description                                                                                                                          | Reference(s)                           |
|------------------------------------------------------------------------------------------------------------|---------------------|-------------------------------------------------------------------------------------------------------------------------------------------|----------------------------------------|
| University of Pennsylvania Smell Identification Test (UPSIT)                                               | Odor identification | 40-item “scratch and sniff” test                                                                                                          | Doty et al. 1984b, 1984a               |
| Cross-Cultural Smell Identification Test (CC-SIT), also called the Brief Smell Identification Test (B-SIT) | Odor identification | 12-item test modified from UPSIT, specifically designed to include cross-cultural odors                                                   | Doty et al. 1996                       |
| Barcelona Smell Test 24 (BAST_24)                                                                          | Odor identification | 24-item test, with participants asked if they can: detect odor, recognize it, and identify it from among 4 choices                        | Cardesin et al. 2006                   |
| San Diego Odor Identification Test (SDOIT)                                                                 | Odor identification | 8-item test with participants given the same 20 choices for all 8 odors                                                                   | Krantz et al. 2009; Murphy et al. 1994 |
| Sniffin’ Sticks                                                                                            | Odor identification | 16-item test using felt-tip pens, with participants selecting correct odor from a list of 4 choices for each odor                         | Hummel et al. 1997                     |
|                                                                                                            | Odor threshold      | Participants presented with three pens at a time, one containing n-butanol and must pick pen containing n-butanol                         |                                        |
|                                                                                                            | Odor discrimination | Participants presented three pens at a time and must pick which of three pens is different from other two                                 |                                        |
| 5-item Modified Sniffin’ Sticks                                                                            | Odor identification | 5-item test modified from Sniffin’ Sticks, with participants given same 20 choices for all 8 odors                                        | Mueller and Renner 2006                |
| Connecticut Chemosensory Clinical Research Center Test (CCCRC)                                             | Odor identification | 10-item test with participants given the same 20 choices for all 10 odors                                                                 | Cain et al. 1983                       |
|                                                                                                            | Odor threshold      | Participants presented with pairs of bottles, one containing butanol and other containing blank and must determine which contains butanol |                                        |
| Smell Diskette Test                                                                                        | Odor identification | 8-item test, with participant choosing correct odor from among 3 choices per odor presented as words and pictures                         | Briner and Simmen 1999                 |

|                                              |                     |                                                                                                                                                                                               |                               |
|----------------------------------------------|---------------------|-----------------------------------------------------------------------------------------------------------------------------------------------------------------------------------------------|-------------------------------|
| Scandinavian Odor Identification Test (SOIT) | Odor identification | 16-item test, with participant selecting correct odor from a list of 4 choices for each odor                                                                                                  | Nordin et al. 1998            |
| Odorant Confusion Matrix (OCM)               | Odor identification | 10-item test, which participant choosing correct odor from a list of the 10 odors, with each item presented multiple times, but overall the same number of times for each item (e.g. 5 or 10) | Wright 1987                   |
| T&T Olfactometry                             | Odor identification | 5-item test, with participants presented with progressively higher concentrations of each until able to identify odor                                                                         | Fujii et al. 2002; Zusho 1983 |
|                                              | Odor threshold      | Same as odor identification test, but threshold concentration taken as level at which participant can detect odor                                                                             |                               |
| Alinamin test                                | Odor identification | Thiamine propyldisulfide administered intravenously and time from administration to patient recognition of smell measured, as well as time of duration of smell                               | Furukawa et al. 1988          |
| Odor Stick Identification Test (OSIT)        | Odor identification | 13 items specifically chosen for Japanese population, with participant choosing correct odor from 4 choices for each odor                                                                     | Hashimoto et al. 2004         |

## REFERENCES

- Briner HR, Simmen D. 1999. Smell diskettes as screening test of olfaction. *Rhinology* 37: 145–148.
- Cain WS, Gent J, Catalanotto FA, Goodspeed RB. 1983. Clinical evaluation of olfaction. *Am. J. Otolaryngol.* 4: 252–256.
- Cardesín A, Alobid I, Benítez P, Sierra E, de Haro J, Bernal-Sprekelsen M, et al. 2006. Barcelona Smell Test - 24 (BAST-24): validation and smell characteristics in the healthy Spanish population. *Rhinology* 44: 83–89.
- Doty RL, Marcus A, Lee WW. 1996. Development of the 12-item Cross-Cultural Smell Identification Test (CC-SIT). *The Laryngoscope* 106: 353–356.
- Doty RL, Shaman P, Dann M. 1984a. Development of the University of Pennsylvania Smell Identification Test: a standardized microencapsulated test of olfactory function. *Physiol. Behav.* 32: 489–502.
- Doty RL, Shaman P, Kimmelman CP, Dann MS. 1984b. University of Pennsylvania Smell Identification Test: a rapid quantitative olfactory function test for the clinic. *The Laryngoscope* 94: 176–178.
- Fujii M, Fukazawa K, Hatta C, Yasuno H, Sakagami M. 2002. Olfactory Acuity after Total Laryngectomy. *Chem. Senses* 27:117–121; doi:10.1093/chemse/27.2.117.
- Furukawa M, Kamide M, Miwa T, Umeda R. 1988. Significance of intravenous olfaction test using thiamine propyldisulfide (Alinamin) in olfactometry. *Auris. Nasus. Larynx* 15: 25–31.
- Hashimoto Y, Fukazawa K, Fujii M, Takayasu S, Muto T, Saito S, et al. 2004. Usefulness of the odor stick identification test for Japanese patients with olfactory dysfunction. *Chem. Senses* 29:565–571; doi:10.1093/chemse/bjh061.
- Hummel T, Sekinger B, Wolf SR, Pauli E, Kobal G. 1997. “Sniffin” Sticks’: Olfactory Performance Assessed by the Combined Testing of Odor Identification, Odor Discrimination and Olfactory Threshold. *Chem. Senses* 22:39–52; doi:10.1093/chemse/22.1.39.
- Krantz EM, Schubert CR, Dalton DS, Zhong W, Huang GH, Klein BEK, et al. 2009. Test-retest reliability of the San Diego Odor Identification Test and comparison with the brief smell identification test. *Chem. Senses* 34:435–440; doi:10.1093/chemse/bjp018.

- Mueller C, Renner B. 2006. A new procedure for the short screening of olfactory function using five items from the “Sniffin’ Sticks” identification test kit. *Am. J. Rhinol.* 20: 113–116.
- Murphy C, Anderson JA, Markison S. 1994. Psychophysical Assessment of Chemosensory Disorders in Clinical Populations. In *Olfaction and Taste XI* (K. Kurihara, N. Suzuki, and H. Ogawaeds. ), pp. 609–613, Springer Japan.
- Nordin S, Brämerson A, Lidén E, Bende M. 1998. The Scandinavian Odor-Identification Test: development, reliability, validity and normative data. *Acta Otolaryngol. (Stockh.)* 118: 226–234.
- Wright HN. 1987. Characterization of olfactory dysfunction. *Arch. Otolaryngol. Head Neck Surg.* 113: 163–168.
- Zusho H. 1983. Olfactometry in Japan. *Rhinology* 21: 281–285.
